# Supplementary material
Source: MDPI journal article supplement (https://www.mdpi.com/2072-4292/12/4/652)
Supplement: s1 [file s1]

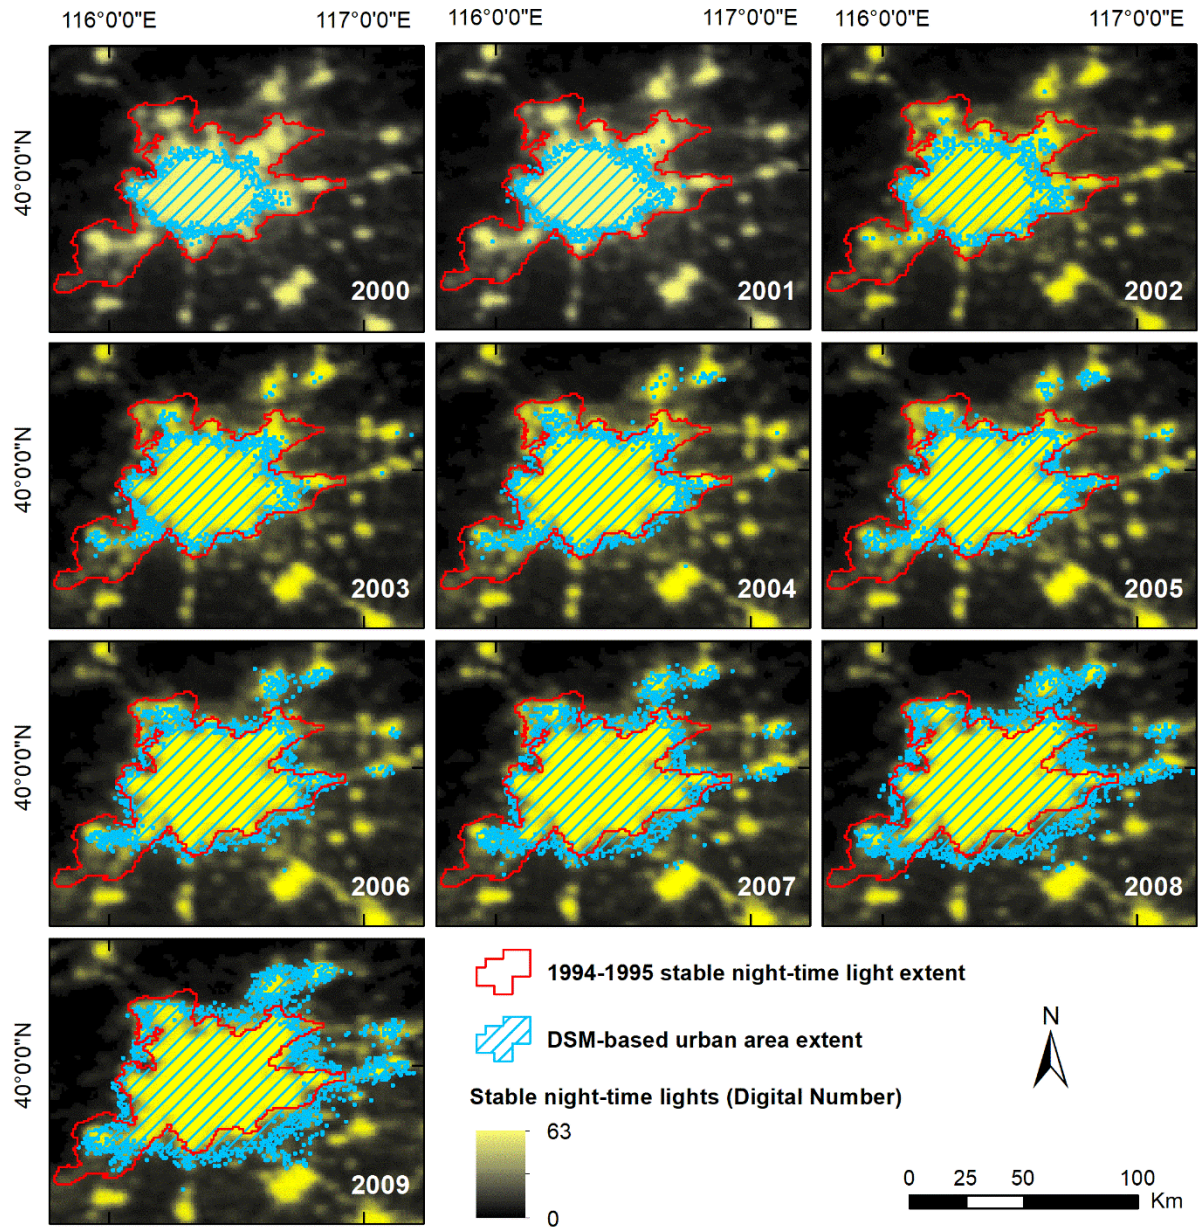

**Figure S1.** Intercalibrated annual "Average Visible, Stable Lights, and Cloud Free Coverages" data [1], with a posting of 30 arc seconds (GCS WGS 1984), overlapped by the corresponding Beijing DSM-based urban area (dashed light blue areas) for each year in the 2000s. The "filtered" Beijing 1994–1995 stable night light extent [20] (red contour) is overlaid on all datasets as a common and consistent spatial reference area.

## References

1. Elvidge, C.D., Imhoff, M.L., Baugh, K.E., Hobson, V.R., Nelson, I., Safran, J., Dietz, J.B., Tuttle, B.T. Night-time lights of the world: 1994–1995. *Isprs J Photogramm* **2001**, 56(2), 81–99.
2. Zhang, Q., Pandey, B., Seto, K.C.A. Robust Method to Generate a Consistent Time Series From DMSP/OLS Nighttime Light Data. *IEEE T Geosci Remote* **2016**, 54(10), 5821– 5831.
